# Supplementary material for: Multiscale Kinetic Modeling of Liposomal Doxorubicin Delivery Quantifies the Role of Tumor and Drug-Specific Parameters in Local Delivery to Tumors
Source: PubMed Central journal article supplement — CPT Pharmacometrics Syst Pharmacol. 2012 Nov 21;1(11):e15–. doi: 10.1038/psp.2012.16 (PMC3600732; doi:10.1038/psp.2012.16), 2012-11-21
Supplement: psp201216x1.pdf [file psp201216x1.pdf]

**SUPPLEMENTARY FIGURE S1**

A, There is significant variability in tumor deposition, both within and across various mouse xenograft tumor models. The maximum %ID/g is plotted for various tumor models, extracted from time course data in the literature.

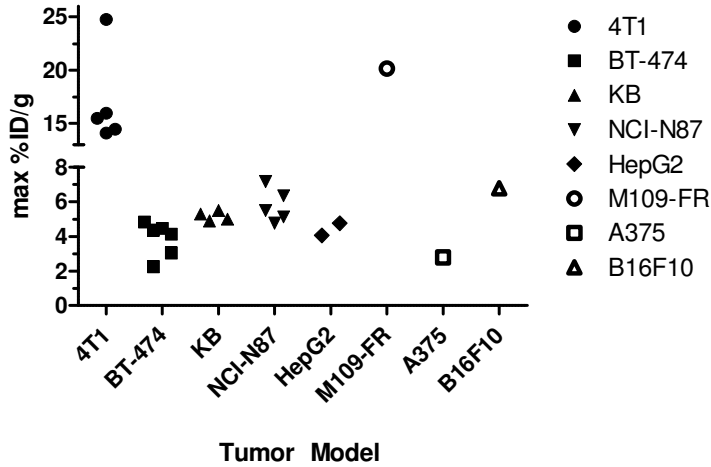

B, the variability in liposome deposition across human tumors:

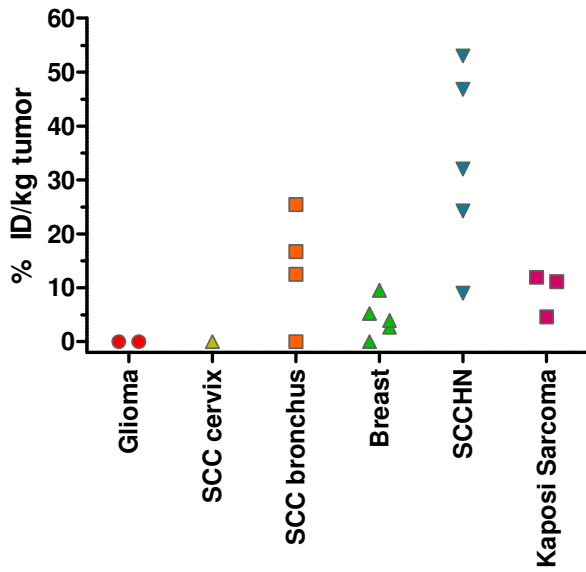

**Data Sources:**

Harrington KJ, et al. Clin Can Res (2001). (PMID: 11234875)  
 Northfelt DW, et al. J Clin Pharmacol (1996). (PMID: 8932544)  
 (all data @ 72 hr)
