# Supplementary figures and images for: Multiscale Kinetic Modeling of Liposomal Doxorubicin Delivery Quantifies the Role of Tumor and Drug-Specific Parameters in Local Delivery to Tumors
Source: PubMed Central journal article supplement — CPT Pharmacometrics Syst Pharmacol. 2012 Nov 21;1(11):e15–. doi: 10.1038/psp.2012.16 (PMC3600732; doi:10.1038/psp.2012.16), 2012-11-21

FIGURE S3

A

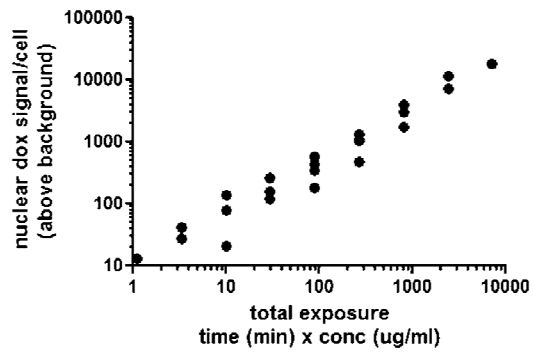

B

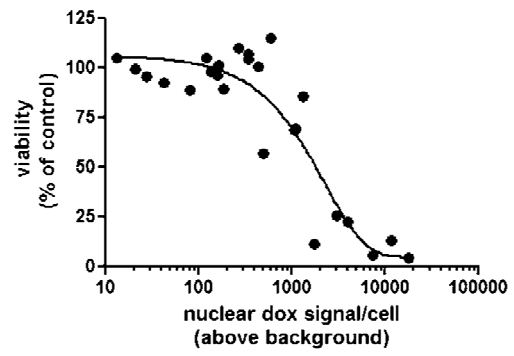

Supplement: psp201216x3.pdf [file psp201216x3.pdf]
